# Supplementary material for: Layer-by-layer fabrication of g-C3N4 coating for headspace solid-phase microextraction of food additives followed by gas chromatography-flame ionization detection
Source: Royal Society of Chemistry journal article supplement (doi:10.1039/c7ay02515g), 2017-12-11
Supplement: c7ay02515g1.pdf [file c7ay02515g1.pdf]

**Layer-by-layer fabrication of g-C<sub>3</sub>N<sub>4</sub> coating for headspace solid-phase microextraction of food additives followed by gas chromatography-flame ionization detection**

Yixin Yang<sup>a</sup>, Peige Qin<sup>a</sup>, Xiaoting Zhang<sup>a</sup>, Jiahua Niu<sup>a</sup>, Shufang Tian<sup>a</sup>, Minghua Lu<sup>\*a</sup>, Jinhua Zhu<sup>a</sup>, Zongwei Cai<sup>\*b</sup>

<sup>a</sup> Institute of Environmental and Analysis Science, School of Chemistry and Chemical Engineering, Henan University, Kaifeng, Henan, 475004, China. E-mail: mhlh@henu.edu.cn (M. Lu).

<sup>b</sup> State Key Laboratory of Environmental and Biological Analysis, Department of Chemistry, Hong Kong Baptist University, 224 Waterloo Road, Kowloon Tong, Hong Kong, SAR, P. R. China. E-Mail: zwcai@hkbu.edu.hk (Z. Cai)

## Supplementary material

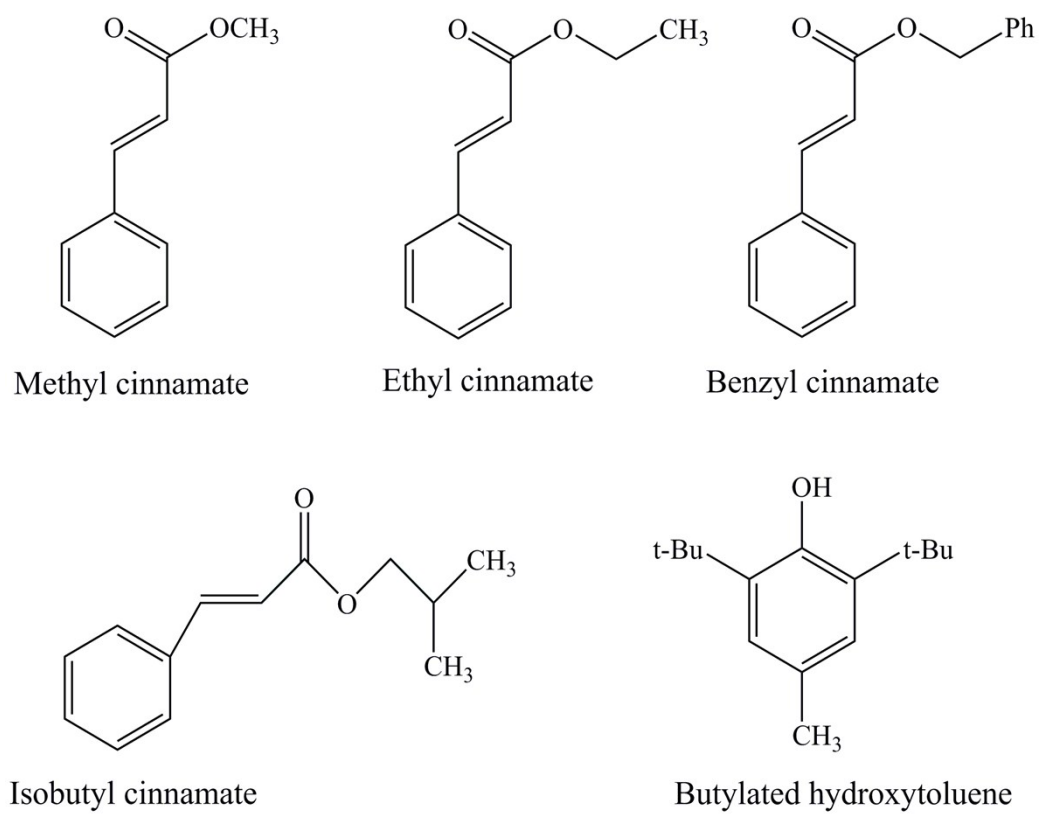

Figure S1 The structures of five target food additives
